# Supplementary material for: Interfacial and Micellization Behavior of Cetyltrimethylammonium Bromide (CTAB) in Water and Methanol-Water Mixture at 298.15 to 323.15 K
Source: Hindawi journal article supplement (doi:10.1155/2020/4653092), 2020-06-29
Supplement: f1 [file 4653092.f1.docx]

**Interfacial and Micellization Behavior of Cetyltrimethylammonium Bromide (CTAB) in Water and Methanol-Water Mixture at 298.15 to 323.15 K**

**Sujit Kumar Shah and Ajaya Bhattarai***

Department of Chemistry, M. M. A. M. C., Tribhuvan University, Biratnagar, Nepal

Email: [bkajaya@yahoo.com](mailto:bkajaya@yahoo.com)

FIGURE S1: Variation of *π*cmc *A*min with *π*cmc: Squares (323.15 K), Closed squares (318.15 K), Triangles (308.15 K) and Circles (298.15 K)

FIGURE S2. Variation of *A*min with 1/ *π*cmc: Triangles (323.15 K), Closed squares (318.15 K), Squares (308.15 K) and Circles (298.15 K)

FIGURE S3. Variation of with the volume fraction of methanol: Closed circles (323.15 K), Triangles (318.15 K), Squares (308.15 K) and Circles (298.15 K)

FIGURE S4. Variation of with the volume fraction of methanol: Closed circles (323.15 K), Triangles (318.15 K), Circles (308.15 K) and Squares (298.15 K)

FIGURE S5. Variation of with the volume fraction of methanol: Closed circles (323.15 K), Triangles (318.15 K), Squares (308.15 K) and Circles (298.15 K)

FIGURE S6. Variation of with the volume fraction of methanol: Closed circles (323.15 K), Triangles (318.15 K), Squares (308.15 K) and Circles (298.15 K)

FIGURE S7. Variation of with the volume fraction of methanol: Closed circles (323.15 K), Triangles (318.15 K), Squares (308.15 K) and Circles (298.15 K)

FIGURE S8. Variation of with the volume fraction of methanol: Closed circles (323.15 K), Triangles (318.15 K), Squares (308.15 K) and Circles (298.15 K)
